# Supplementary material
Source: PubMed Central journal article supplement (PMC5461792)
Supplement: ASN.2016070797SupplementaryData.pdf [file ASN.2016070797SupplementaryData.pdf]

Supplementary Table 1: ABMR Treatment

|                                                       | All patients<br>(n= 205) |             | Pre-existing DSA<br>(n= 103) |            | De novo DSA<br>(n= 102) |            | P                 |
|-------------------------------------------------------|--------------------------|-------------|------------------------------|------------|-------------------------|------------|-------------------|
|                                                       | n                        |             | n                            |            | n                       |            |                   |
| <b>Treatment after biopsy</b>                         |                          |             |                              |            |                         |            |                   |
| <b>Steroids, No. (%)</b>                              | 205                      | 120 (58.54) | 103                          | 81 (78.64) | 102                     | 39 (38.24) | <b>&lt;0.0001</b> |
| <b>Plamaspheresis, No. (%)</b>                        | 205                      | 91 (44.39)  | 103                          | 63 (61.17) | 102                     | 28 (26.92) | <b>&lt;0.0001</b> |
| <b>Anti-CD20 therapy, No. (%)</b>                     | 205                      | 90 (43.90)  | 103                          | 49 (47.57) | 102                     | 41 (40.20) | <b>0.178</b>      |
| <b>Immunoglobulin IV, No. (%)</b>                     | 205                      | 109 (53.17) | 103                          | 56 (54.37) | 102                     | 53 (51.96) | <b>0.419</b>      |
| <b>Baseline Immunosuppression at the time of ABMR</b> | 205                      |             | 103                          |            | 102                     |            |                   |
| <b>Tacrolimus, No. (%)</b>                            |                          | 151 (73.66) |                              | 90 (87.38) |                         | 61 (59.80) | <b>&lt;0.0001</b> |
| <b>Cyclosporine, No. (%)</b>                          |                          | 45 (21.95)  |                              | 9 (8.74)   |                         | 36 (35.29) | <b>&lt;0.0001</b> |

**Supplementary Table 2:** Top 30 pre-existing DSA ABMR related transcripts with their corresponding fold change and p value (t-test) and the fold change and p value in the *de novo* DSA group

| Probe Set ID  | Name                                                | GENE           | Adjusted P.Value<br>in the pre-<br>existing DSA<br>group | Fold change in<br>the pre-existing<br>DSA group | Adjusted<br>P.Value in the<br><i>de novo</i> DSA<br>group | Fold change<br>in the <i>de<br/>novo</i> DSA<br>group |
|---------------|-----------------------------------------------------|----------------|----------------------------------------------------------|-------------------------------------------------|-----------------------------------------------------------|-------------------------------------------------------|
| 11744128_x_at | Chemokine (C-X-C motif) ligand 2                    | <b>CXCL2</b>   | 1.31e-29                                                 | 7.62                                            | .0005019                                                  | 1.92                                                  |
| 11719218_at   | Suppressor of cytokine signaling 3                  | <b>SOCS3</b>   | 3.54e-30                                                 | 7.47                                            | .0008198                                                  | 1.87                                                  |
| 11718982_s_at | Chemokine (C-C motif) ligand 4                      | <b>CCL4</b>    | 7.85e-20                                                 | 6.45                                            | 2.54e-15                                                  | 5.22                                                  |
| 11732467_x_at | Chemokine (C-X-C motif) ligand 11                   | <b>CXCL11</b>  | 5.00e-14                                                 | 6.13                                            | 7.05e-12                                                  | 5.64                                                  |
| 11749245_a_at | Chemokine (C-X-C motif) ligand 11                   | <b>CXCL11</b>  | 2.15e-13                                                 | 5.96                                            | 1.48e-11                                                  | 5.56                                                  |
| 11718983_x_at | Chemokine (C-C motif) ligand 4                      | <b>CCL4</b>    | 1.29e-21                                                 | 5.70                                            | 2.39e-16                                                  | 4.60                                                  |
| 11717345_a_at | FBJ murine osteosarcoma viral oncogene<br>homolog B | <b>FOSB</b>    | 1.06e-36                                                 | 5.32                                            | .0021794                                                  | 1.51                                                  |
| 11732466_a_at | Chemokine (C-X-C motif) ligand 11                   | <b>CXCL11</b>  | 4.27e-12                                                 | 5.28                                            | 1.12e-11                                                  | 5.54                                                  |
| 11723679_s_at | CD69 molecule                                       | <b>CD69</b>    | 1.66e-17                                                 | 4.99                                            | 8.31e-08                                                  | 2.89                                                  |
| 11746954_s_at | Chemokine (C-C motif) ligand 4                      | <b>CCL4</b>    | 1.02e-22                                                 | 4.81                                            | 2.15e-16                                                  | 3.79                                                  |
| 11719943_at   | Chemokine (C-X-C motif) ligand 9                    | <b>CXCL9</b>   | 6.17e-11                                                 | 4.70                                            | 8.41e-10                                                  | 4.52                                                  |
| 11718396_x_at | Jun proto-oncogene                                  | <b>JUN</b>     | 9.15e-39                                                 | 4.42                                            | .0000453                                                  | 1.61                                                  |
| 11718394_at   | Jun proto-oncogene                                  | <b>JUN</b>     | 1.86e-34                                                 | 4.31                                            | .0001103                                                  | 1.62                                                  |
| 11744127_at   | Chemokine (C-X-C motif) ligand 2                    | <b>CXCL2</b>   | 1.42e-27                                                 | 4.17                                            | .0061218                                                  | 1.46                                                  |
| 11718395_s_at | Jun proto-oncogene                                  | <b>JUN</b>     | 5.81e-33                                                 | 4.09                                            | .0002306                                                  | 1.58                                                  |
| 11720298_at   | Chemokine (C-X-C motif) ligand 10                   | <b>CXCL10</b>  | 4.19e-11                                                 | 4.05                                            | 1.42e-09                                                  | 3.80                                                  |
| 11720994_x_at | Chemokine (C-C motif) ligand 3                      | <b>CCL3</b>    | 6.25e-34                                                 | 3.971                                           | 2.41e-09                                                  | 1.93                                                  |
| 11744660_s_at | Chemokine (C-C motif) ligand 4-like 1               | <b>CCL4L1</b>  | 1.19e-20                                                 | 3.96                                            | 1.45e-13                                                  | 3.12                                                  |
| 11722728_a_at | Early growth response 2                             | <b>EGR2</b>    | 5.46e-15                                                 | 3.59                                            | 7.03e-07                                                  | 2.35                                                  |
| 11726316_at   | Selectin E                                          | <b>SELE</b>    | 1.88e-17                                                 | 3.47                                            | 6.97e-08                                                  | 2.25                                                  |
| 11717861_a_at | Early growth response 1                             | <b>EGR1</b>    | 2.12e-23                                                 | 3.47                                            | .001777                                                   | 1.50                                                  |
| 11742765_at   | Regulator of G-protein signaling 1                  | <b>RGS1</b>    | 2.28e-20                                                 | 3.42                                            | 5.58e-06                                                  | 1.92                                                  |
| 11719344_a_at | Activating transcription factor 3                   | <b>ATF3</b>    | 2.54e-19                                                 | 3.38                                            | .0050197                                                  | 1.48                                                  |
| 11715493_a_at | Cysteine-rich, angiogenic inducer, 61               | <b>CYR61</b>   | 8.79e-28                                                 | 3.21                                            | .0000255                                                  | 1.63                                                  |
| 11759525_at   | Growth arrest and DNA-damage-inducible,<br>beta     | <b>GADD45B</b> | 1.73e-27                                                 | 3.12                                            | .0073953                                                  | 1.34                                                  |
| 11725631_a_at | Nuclear receptor subfamily 4, group A,<br>member 2  | <b>NR4A2</b>   | 1.53e-23                                                 | 3.08                                            | .0000189                                                  | 1.63                                                  |
| 11717994_a_at | Nuclear receptor subfamily 4, group A,<br>member 1  | <b>NR4A1</b>   | 4.42e-21                                                 | 3.03                                            | .0020826                                                  | 1.48                                                  |
| 11757865_a_at | Growth arrest and DNA-damage-inducible,<br>beta     | <b>GADD45B</b> | 4.52e-23                                                 | 2.94                                            | .0563202                                                  | 1.26                                                  |
| 11763715_a_at | Granulysin                                          | <b>GNLY</b>    | 7.62e-20                                                 | 2.93                                            | 3.64e-20                                                  | 3.09                                                  |
| 11743168_at   | indoleamine 2,3-dioxygenase 1                       | <b>IDO1</b>    | 2.479e-09                                                | 2.90                                            | 1.333e-12                                                 | 3.71                                                  |

**Supplementary Table 3: Factors associated with kidney allograft loss in the multivariate analysis for the ABMR during the first 6 years after transplantation**

|                                                 |                    | <b>Number<br/>of<br/>patients</b> | <b>Number<br/>of<br/>events</b> | <b>HR</b> | <b>95% CI</b> | <b>P</b>      |
|-------------------------------------------------|--------------------|-----------------------------------|---------------------------------|-----------|---------------|---------------|
| <b>Proteinuria (g/g creatinine)</b>             | < 0.30             | 90                                | 21                              | 1         | -             |               |
|                                                 | ≥ 0.30             | 71                                | 38                              | 2.890     | (1.683-4.962) | <b>0.0001</b> |
| <b>DSA characteristic</b>                       | Pre-existing DSA   | 101                               | 28                              | 1         | -             |               |
|                                                 | <i>De novo</i> DSA | 60                                | 31                              | 1.737     | (1.016-2.972) | <b>0.0438</b> |
| <b>Transplant glomerulopathy<br/>(cg) score</b> | Negative           | 103                               | 28                              | 1         | -             |               |
|                                                 | Positive           | 58                                | 31                              | 2.038     | (1.200-3.962) | <b>0.0085</b> |

**Supplementary Table 4: Baseline characteristics of the reference set population**

|                                                                  | <b>Reference set:<br/>Kidney biopsies without ABMR<br/>(n=461)</b> |
|------------------------------------------------------------------|--------------------------------------------------------------------|
| <b>Recipient age</b> ( <i>years, mean ± SD</i> )                 | 48.98 ± 14.57                                                      |
| <b>Recipient male sex</b> ( <i>n, %</i> )                        | 292 (65.18%)                                                       |
| <b>ESRD causes</b>                                               |                                                                    |
| <b>Glomerulonephritis</b> , No. (%)                              | 151 (32.75%)                                                       |
| <b>Diabetes</b> , No. (%)                                        | 82 (17.79%)                                                        |
| <b>Polycystic Kidney Disease</b> , No. (%)                       | 44 (9.54%)                                                         |
| <b>Tubulo-interstitial disease</b> , No. (%)                     | 47 (10.20%)                                                        |
| <b>Hypertension</b> , No. (%)                                    | 16 (3.47%)                                                         |
| <b>Unknown</b> , No. (%)                                         | 86 (18.66%)                                                        |
| <b>Other</b> , No. (%)                                           | 35 (7.59%)                                                         |
| <b>Donor age</b> ( <i>years, mean ± SD</i> )                     | 43.66 ± 14.27                                                      |
| <b>Donor male sex</b> ( <i>n, %</i> )                            | 188 (46.88%)                                                       |
| <b>Donor deceased</b> ( <i>n, %</i> )                            | 269 (61.00%)                                                       |
| <b>Biopsy characteristics</b>                                    |                                                                    |
| Time since transplantation ( <i>years, mean ± SD</i> )           | 3.10 ± 4.79                                                        |
| GFR ( <i>mL/min/1.73m<sup>2</sup>, mean ± SD</i> )               | 36.71 ± 23.54                                                      |
| Acute kidney injury ( <i>n, %</i> )                              | 45 (9.76%)                                                         |
| T-cell mediated rejection ( <i>n, %</i> )                        | 56 (12.5%)                                                         |
| Borderline lesions ( <i>n, %</i> )                               | 79 (17.14%)                                                        |
| Recurrent glomerulonephritis ( <i>n, %</i> )                     | 65 (14.10%)                                                        |
| BK virus nephropathy ( <i>n, %</i> )                             | 17 (3.69%)                                                         |
| Isolated interstitial fibrosis – tubular atrophy ( <i>n, %</i> ) | 74 (16.05%)                                                        |
| No major abnormalities ( <i>n, %</i> )                           | 101 (21.91%)                                                       |
| Other ( <i>n, %</i> )                                            | 24 (5.21%)                                                         |

**Supplementary Figure 1: Graft survival according to anti-HLA DSA characteristics (pre-existing anti-HLA DSA and *de novo* anti-HLA DSA) and anti-HLA DSA class at the time of ABMR. This shows the probability of graft survival, which is based on the DSA characteristics and the DSA class.**

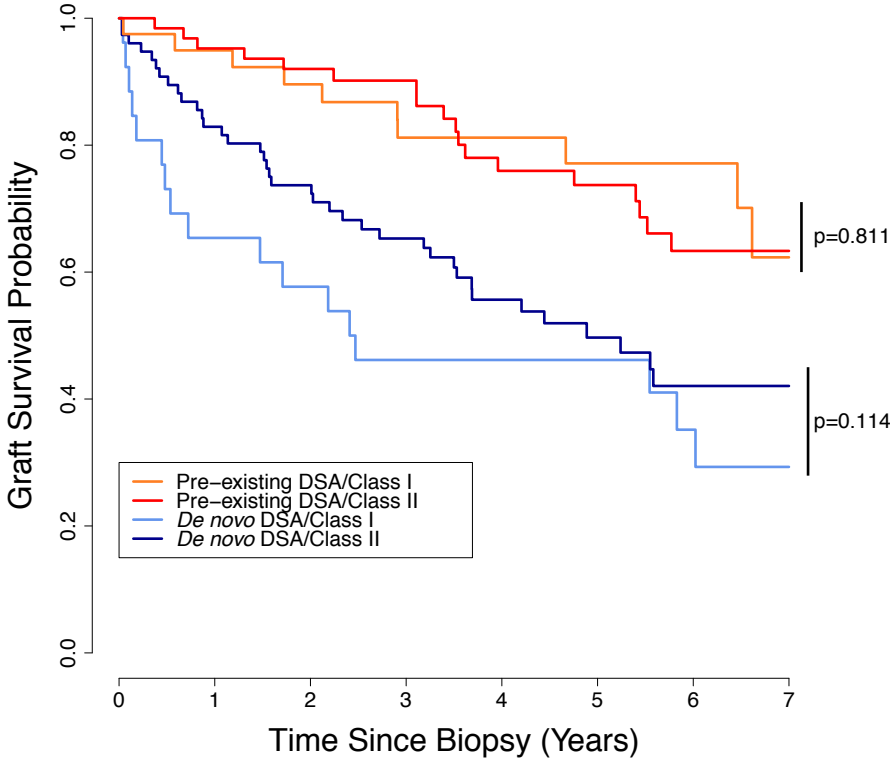

| N at Risk                   | 0  | 1  | 2  | 3  | 4  | 5  | 6  | 7  |
|-----------------------------|----|----|----|----|----|----|----|----|
| <i>De novo</i> DSA/Class I  | 26 | 17 | 15 | 12 | 11 | 9  | 6  | 1  |
| <i>De novo</i> DSA/Class II | 76 | 63 | 55 | 44 | 32 | 22 | 16 | 9  |
| Pre-existing DSA/Class I    | 40 | 36 | 32 | 29 | 25 | 18 | 14 | 6  |
| Pre-existing DSA/Class II   | 63 | 59 | 55 | 45 | 36 | 31 | 18 | 11 |

**Supplementary Figure 2: Histology according to DSA characteristics in ABMR biopsies performed between the first and the third year post-transplant.** Data are based on 49 allograft biopsies performed between the first and the third year post-transplant. The T bars indicate standard errors and DSA denotes donor-specific anti-HLA antibodies.

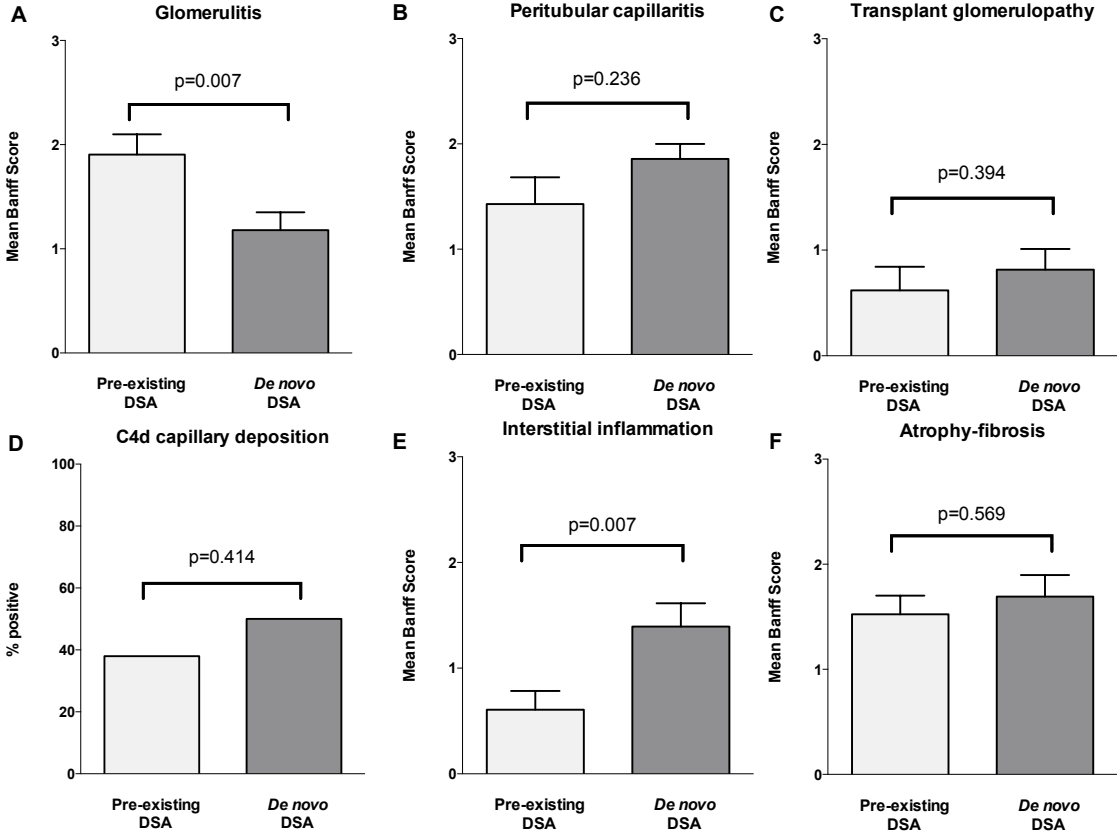

**Supplementary Figure 3: Graft survival according to anti-HLA DSA characteristics in ABMR biopsies performed between the first and the third year post-transplant. This shows the probability of graft survival, which is based on the DSA characteristics.**

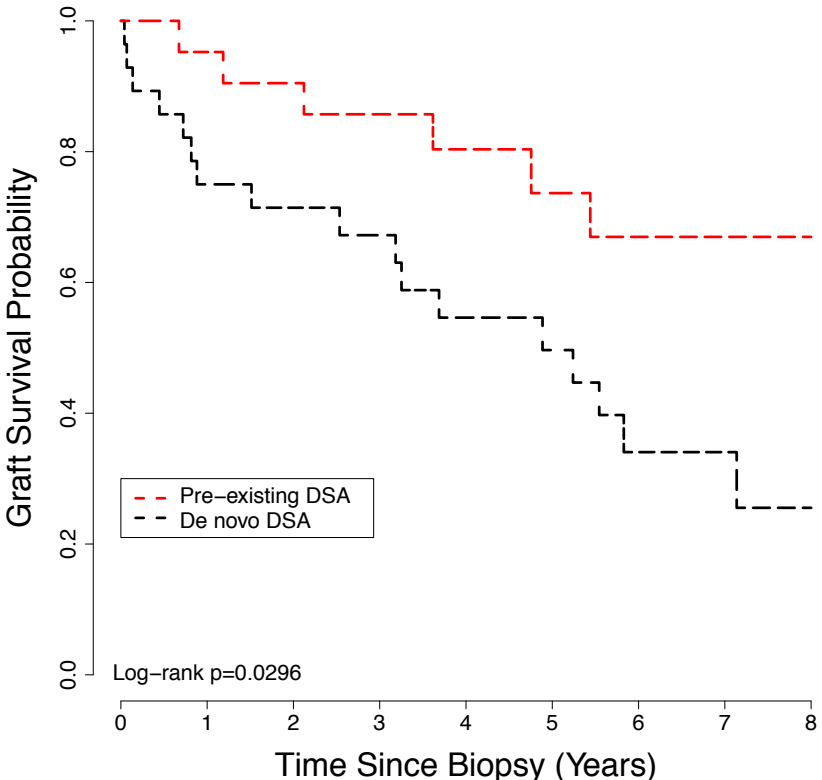

N at Risk

|                    |    |    |    |    |    |    |   |   |   |
|--------------------|----|----|----|----|----|----|---|---|---|
| <i>De novo</i> DSA | 28 | 21 | 19 | 16 | 13 | 10 | 6 | 4 | 2 |
| Pre-existing DSA   | 21 | 20 | 19 | 16 | 13 | 11 | 6 | 4 | 2 |
